# Supplementary material for: Mutation-Associated Phenotypic Heterogeneity in Novel and Canonical PIK3CA Helical and Kinase Domain Mutants
Source: MDPI journal article supplement (doi:10.3390/cells9051116), 2020-04-30
Supplement: s1 [file s1]

# Mutation-associated phenotypic heterogeneity in novel and canonical PIK3CA helical and kinase domain mutants

Arman Ali Ghodsinia <sup>1,†</sup>, J-Ann Marie T. Lego <sup>1</sup> and Reynaldo L. Garcia <sup>1,\*</sup>

<sup>1</sup> Disease Molecular Biology and Epigenetics Laboratory, National Institute of Molecular Biology and Biotechnology, University of the Philippines Diliman, Quezon City 1101, Philippines

\* Correspondence: [reygarcia@mbb.upd.edu.ph](mailto:reygarcia@mbb.upd.edu.ph)

† Present address: MRC Oxford Institute for Radiation Oncology, Department of Oncology, Old Road Campus Research Building, Roosevelt Drive, University of Oxford, Oxford, OX3 7DQ, United Kingdom

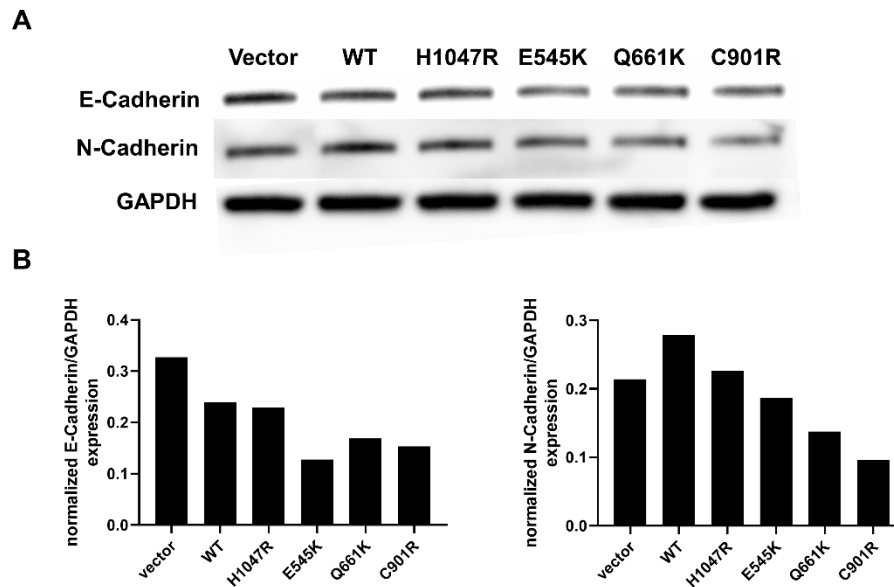

**Supplementary Figure S2.** Western blotting detection of epithelial-to-mesenchymal transition markers. (A) E- and N-cadherin expression levels in HCT116 cells transfected with wild type and mutant PIK3CA gene constructs. (B) Band intensities of E- and N-cadherin were normalized against GAPDH expression.
